# Supplementary material for: Model Development for Risk Assessment of Driving on Freeway under Rainy Weather Conditions
Source: PubMed Central journal article supplement (PMC4764618; doi:10.1371/journal.pone.0149442), 2016-02-19
Supplement: pone.0149442.s003.pdf [file pone.0149442.s003.pdf]

# Driver's Questionnaire Form

Data: \_\_\_\_\_ (mm/dd/yyyy)

Time: \_\_\_\_\_ (hh:mm)

Weather: \_\_\_\_\_ (Rain Intensity: I, II, III, IV)

Survey Location: \_\_\_\_\_

Driver's Gender:  Male  Female

Driver's Age: \_\_\_\_\_

Driving Experience: \_\_\_\_\_ (By year)

The Type of Vehicle Driven:

Small Vehicle  Large Vehicle (two-axle large trucks, multi-axle large trucks)

Scenario:

You drive your owned vehicle on Freeway G15 in China under this weather condition now.

Questions:

1. Which level is perceived risk by you, if driving on the basic segment (shown in Fig. 1)?

Slight  General  Serious  Catastrophic

2. Which level is perceived risk by you, if driving on the toll gate (shown in Fig. 1)?

Slight  General  Serious  Catastrophic

3. Which level is perceived risk by you, if driving on the ramp (shown in Fig. 1)?

Slight  General  Serious  Catastrophic

4. Which level is perceived risk by you, if driving on the weaving area (shown in Fig. 1)?

Slight  General  Serious  Catastrophic

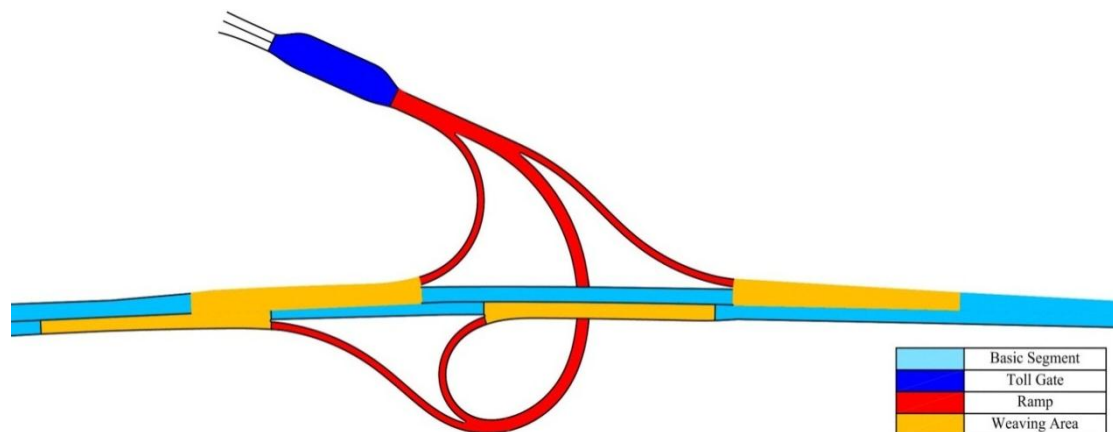

Fig. 1. Instructions for four various segments on Freeway G15.
